# Supplementary material
Source: PubMed Central journal article supplement (PMC10992902)

## Supplemental Method

### Search strategies for PubMed, EMBASE, and Cochrane database

#### PubMed:28 results

((("extensive stage small cell lung cancer"[Title/Abstract] OR "ES-SCLC"[Title/Abstract]) AND (((((((((((("pembrolizumab"[Title/Abstract] OR "nivolumab"[Title/Abstract] OR "atezolizumab"[Title/Abstract] OR "durvalumab"[Title/Abstract] OR "tremelimumab"[Title/Abstract] OR "avelumab"[Title/Abstract] OR "immune checkpoint inhibitor"[Title/Abstract] OR "immune therapy"[Title/Abstract] OR "immunotherapy"[Title/Abstract] OR "programmed cell death protein 1"[Title/Abstract] OR "programmed cell death ligand 1"[Title/Abstract] OR "PD-1"[Title/Abstract] OR "PD-L1"[Title/Abstract])))))))))))) AND (("randomized"[Title/Abstract] OR "trial"[Title/Abstract])OR "clinical"[Title/Abstract])

#### Embase:68 results

('pembrolizumab':ab,ti OR 'nivolumab':ab,ti OR 'atezolizumab':ab,ti OR 'durvalumab':ab,ti OR 'tremelimumab':ab,ti OR 'avelumab':ab,ti OR 'immune checkpoint inhibitor':ab,ti OR 'immunotherapy':ab,ti OR 'programmed cell death ligand 1':ab,ti OR 'programmed death 1 receptor':ab,ti OR 'PD-1':ab,ti OR 'PD-L1':ab,ti) AND (('extensive stage' AND 'small cell' AND ('lung'/exp OR lung) AND ('cancer'/exp OR cancer)) AND ('randomized controlled trial'/exp))

#### Cochrane: 120 results (120 trials)

#1 MeSH descriptor: [Small Cell Lung Carcinoma] explode all trees

#2 "lung" AND "extensive stage" AND("Small Cell" OR "Small-Cell" )

#3 "pembrolizumab" or "nivolumab" or "atezolizumab" or "durvalumab" or "tremelimumab" or "avelumab" or "immune checkpoint inhibitor" or "immunotherapy" or "programmed cell death ligand 1" or "programmed cell death protein 1" or "PD-1" or "PD-L1"

# 4 (#1 OR #2) AND #3

**Supplemental Table 1.** Quality assessment by Cochrane Collaboration's tool.

| Trial        | Sequence generation | Allocation concealment           | Blinding              | Incomplete outcome data | Selective reporting | Other source of bias   |
|--------------|---------------------|----------------------------------|-----------------------|-------------------------|---------------------|------------------------|
| IMpower 133  | Adequate            | Adequate<br>(Central allocation) | Adequate <sup>a</sup> | Adequate                | Adequate            |                        |
| CASPIAN      | Adequate            | Adequate<br>(Central allocation) | Adequate <sup>a</sup> | Adequate                | Adequate            |                        |
| KEYNOTE -604 | Adequate            | Adequate<br>(Central allocation) | Adequate <sup>a</sup> | Adequate                | Adequate            |                        |
| EA5161       | Adequate            | Adequate<br>(Central allocation) | Adequate <sup>a</sup> | Inadequate <sup>b</sup> | Adequate            | Data from the abstract |

a: The sponsor, investigator and subject were aware of the treatment administration but the response to treatment was assessed by means of blinded, independent, central radiologic review.

b: Absence of data of ORR and AEs.

**Supplemental Figure 1.** Flowchart for trial selection

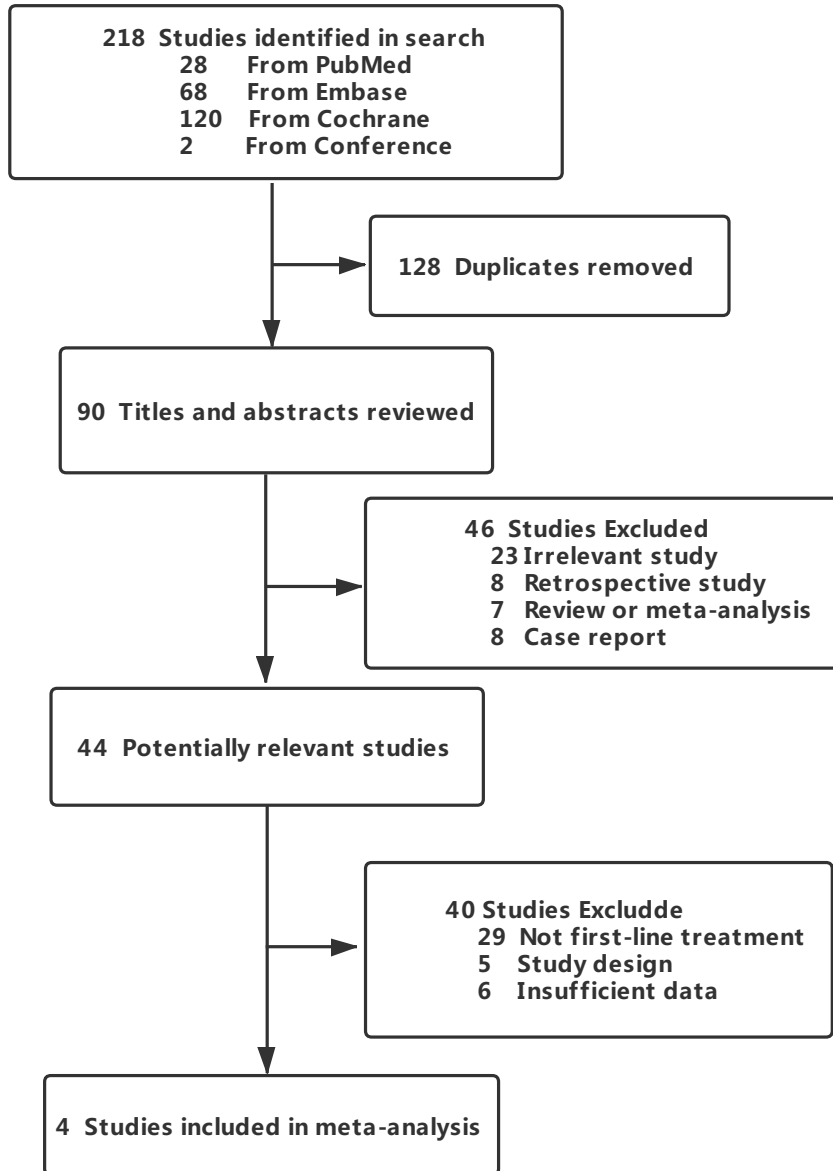

Supplement: 262_2021_3017_MOESM1_ESM.pdf [file 262_2021_3017_MOESM1_ESM.pdf]
